# Supplementary material for: Randomised, open-label, multicentre trial comparing haemodialysis plus haemoperfusion versus haemodialysis alone in adult patients with end-stage renal disease (HD/HP vs HD): study protocol
Source: PubMed Central journal article supplement — BMJ Open. 2018 Jul 28;8(7):e022169. doi: 10.1136/bmjopen-2018-022169 (PMC6067402; doi:10.1136/bmjopen-2018-022169), 2018-07-28
Supplement: bmjopen-2018-022169.draft_revisions.pdf [file bmjopen-2018-022169.draft_revisions.pdf]

# BMJ Open

BMJ Open is committed to open peer review. As part of this commitment we make the peer review history of every article we publish publicly available.

When an article is published we post the peer reviewers' comments and the authors' responses online. We also post the versions of the paper that were used during peer review. These are the versions that the peer review comments apply to.

The versions of the paper that follow are the versions that were submitted during the peer review process. They are not the versions of record or the final published versions. They should not be cited or distributed as the published version of this manuscript.

BMJ Open is an open access journal and the full, final, typeset and author-corrected version of record of the manuscript is available on our site with no access controls, subscription charges or pay-per-view fees (<http://bmjopen.bmj.com>).

If you have any questions on BMJ Open's open peer review process please email [info.bmjopen@bmj.com](mailto:info.bmjopen@bmj.com)

# BMJ Open

**A randomized, open-label, multi-centre trial comparing hemodialysis plus hemoperfusion versus hemodialysis alone in adult patients with end-stage renal disease (HD/HPvsHD): study protocol**

|                               |                                                                                                                                                                                                                                                                                                                                                                                                                                                                                                                                                                                                                                                                                                                                                                                                                                                                                                                                                                                                                                                                                                                                                                                                                                                                                                                                                                               |
|-------------------------------|-------------------------------------------------------------------------------------------------------------------------------------------------------------------------------------------------------------------------------------------------------------------------------------------------------------------------------------------------------------------------------------------------------------------------------------------------------------------------------------------------------------------------------------------------------------------------------------------------------------------------------------------------------------------------------------------------------------------------------------------------------------------------------------------------------------------------------------------------------------------------------------------------------------------------------------------------------------------------------------------------------------------------------------------------------------------------------------------------------------------------------------------------------------------------------------------------------------------------------------------------------------------------------------------------------------------------------------------------------------------------------|
| Journal:                      | <i>BMJ Open</i>                                                                                                                                                                                                                                                                                                                                                                                                                                                                                                                                                                                                                                                                                                                                                                                                                                                                                                                                                                                                                                                                                                                                                                                                                                                                                                                                                               |
| Manuscript ID                 | bmjopen-2018-022169                                                                                                                                                                                                                                                                                                                                                                                                                                                                                                                                                                                                                                                                                                                                                                                                                                                                                                                                                                                                                                                                                                                                                                                                                                                                                                                                                           |
| Article Type:                 | Protocol                                                                                                                                                                                                                                                                                                                                                                                                                                                                                                                                                                                                                                                                                                                                                                                                                                                                                                                                                                                                                                                                                                                                                                                                                                                                                                                                                                      |
| Date Submitted by the Author: | 23-Feb-2018                                                                                                                                                                                                                                                                                                                                                                                                                                                                                                                                                                                                                                                                                                                                                                                                                                                                                                                                                                                                                                                                                                                                                                                                                                                                                                                                                                   |
| Complete List of Authors:     | <p>Lu, Wei; Xin Hua Hospital affiliated to Shanghai Jiao Tong University School of Medicine, Renal Division, Department of Internal Medicine<br/>         Jiang, Geng-Ru; Xin Hua Hospital affiliated to Shanghai Jiao Tong University School of Medicine, Renal Division, Department of Internal Medicine<br/>         Ding, X. Q.; Zhong Shan Hospital affiliated to Fudan University<br/>         Ni, Zhao-Hui; Renji Hospital affiliated to Shanghai Jiao Tong University School of Medicine<br/>         Chen, Xiao-Nong; Rui Jin Hospital affiliated to Shanghai Jiao Tong University School of Medicine<br/>         Yuan, Wei-Jie; Shanghai First People's Hospital affiliated of Shanghai Jiao Tong University<br/>         Wang, Nian-Song; Shanghai Sixth People's Hospital affiliated to Shanghai Jiao Tong University<br/>         Guo, Zhi-Yong; Chang Hai Hospital affiliated to Second Military Medical University<br/>         Ding, Feng; Shanghai Ninth People's Hospital affiliated to Shanghai Jiao Tong University School of Medicine<br/>         Deng, Yue-Yi; Long Hua Hospital affiliated to Shanghai University of Traditional Chinese Medicine<br/>         Yu, Chen; Shanghai Tongji Hospital affiliated to Tongji University School of Medicine<br/>         Zhou, Rong; Yangpu Hospital affiliated to Tongji University School of Medicine</p> |
| Keywords:                     | hemodialysis, hemoperfusion, mortality                                                                                                                                                                                                                                                                                                                                                                                                                                                                                                                                                                                                                                                                                                                                                                                                                                                                                                                                                                                                                                                                                                                                                                                                                                                                                                                                        |

SCHOLARONE™  
Manuscripts

1  
2  
3 A randomized, open-label, multi-centre trial comparing hemodialysis plus  
4 hemoperfusion versus hemodialysis alone in adult patients with end-stage renal  
5 disease (HD/HPvsHD): study protocol  
6  
7

8  
9 **Wei Lu<sup>1\*</sup>, Geng-Ru Jiang<sup>1</sup>, and the HD/HPvsHD trial Group (Geng-Ru Jiang, Xiao-Qiang**  
10 **Ding, Zhao-Hui Ni, Xiao-Nong Chen, Wei-Jie Yuan, Nian-Song Wang, Zhi-Yong Guo,**  
11 **Feng Ding, Yue-Yi Deng, Chen Yu and Rong Zhou)**  
12  
13  
14

15  
16 <sup>1</sup> Renal Division, Department of Internal Medicine, Xin Hua Hospital Affiliated to Shanghai Jiao  
17 Tong University School of Medicine, Shanghai 200092, China.  
18  
19

20  
21 **\* Address correspondence to:**  
22

23 Wei Lu, MD, Renal Division, Department of Internal Medicine, Xin Hua Hospital affiliated to  
24 Shanghai Jiao Tong University School of Medicine, Shanghai 200092, China.

25 Tel: 86-21-25077783  
26

27 E-mail: luwei03@xinhumed.com.cn  
28  
29  
30  
31

32 Wei Lu and Geng-Ru Jiang contributed equally to this paper.  
33  
34  
35  
36  
37  
38  
39  
40  
41  
42  
43  
44  
45  
46  
47  
48  
49  
50  
51  
52  
53  
54  
55  
56  
57  
58  
59  
60

## ABSTRACT

**Introduction** Hemodialysis is the cornerstone treatment for end-stage renal disease (ESRD) patients. However, highly protein-bound or lipophilic toxins such as phenolic and indolic compounds and homocysteine, which are associated with adverse outcomes such as cardiovascular disease, are difficult to remove via hemodialysis. Unlike the diffusive clearance with hemodialysis or convective clearance with hemofiltration, hemoperfusion effectively eliminates highly protein-bound and lipophilic toxins. The HD/HPvsHD (a randomized, open-label, multi-centre trial comparing hemodialysis plus hemoperfusion versus hemodialysis alone in ESRD patients) is the first randomized, open-label, multi-centre therapeutic trial to observe whether hemodialysis plus hemoperfusion is superior to hemodialysis alone in the improvement of patient survival.

**Methods and analysis** 1364 adult maintenance hemodialysis patients will be enrolled from eleven medical centers in Shanghai and randomized to receive hemodialysis plus hemoperfusion or hemodialysis alone at a 1:1 ratio after 1-month run-in period. In both arms, patients will receive low-flux hemodialysis at a frequency of 2 times a week and hemodiafiltration at a frequency of once a week. In the experiment group, in addition to the treatments in the control arm, hemoperfusion will be conducted once every two weeks using a HA130 resin hemoperfusion apparatus. Follow-up is scheduled at 3, 6, 12, 18, and 24 months after randomization, and will consist: routine physical examinations, standard lab panels (blood routine, liver/kidney functions, coagulation test, etc.), Kt/V, chest X-ray, electrocardiogram, echocardiography, New York Heart Association grading of heart function. The primary outcomes will include 24-month all-cause mortality. Secondary outcomes will include cardiovascular-related mortality, the occurrence of major cardiovascular events and the quality of life assessed by Kidney Disease Quality of Life Short Form.

**Ethics and dissemination** The protocol has been approved by the Ethical Committees of all eleven participating centres. Study results will be disseminated through peer-reviewed journals and conference presentations.

**Trial registration numbers** ClinicalTrials.gov Identifier: NCT03227770

### Strengths and limitations of this study

- The HD/HPvsHD trial is the first clinical trial that uses mortality as the primary outcome in

ESRD patients receiving hemodialysis plus hemoperfusion versus hemodialysis alone.

- The strength of the proposed study includes relatively long follow-up (24-month), large sample size (n=1,364), and multi centres representing a major Metropolitan area in China.
- A major weakness of the proposed study is the estimation of uremic toxin removal efficiency using only standard tests (e.g., iPTH, hsCRP,  $\beta$ 2 microglobulin and homocysteine). Many relevant protein-bound uremic toxins, including phenolic and indolic compounds, will not be measured (due to practical issues).

For peer review only

## Introduction

Despite the advance in blood purification technology and pharmacological treatment, mortality rates of end-stage renal disease (ESRD) patients undergoing renal replacement treatment including hemodialysis and peritoneal dialysis remain high. Cardiovascular disease (CVD) is the leading cause of death in maintenance hemodialysis (MHD) patients.<sup>1</sup> According to the U.S. Renal Data System (USRD), although the mortality rate of MHD patients has dropped by 26% between 1993 and 2012, there was no significant decrease in death caused by CVD.<sup>2</sup> In Japan, the Japanese society for dialysis therapy renal data registry reported that CVD mortality accounts for nearly 40% of all causes of mortality.<sup>3</sup>

There are emerging evidences suggesting that uremic toxins are associated with significant morbidity and mortality in ESRD patients.<sup>4</sup> Based on the physicochemical properties, the European Uremic Toxin Work Group classified uremic toxins into three major categories: 1) small, water-soluble molecules such as urea and creatinine, which can be efficiently removed by hemodialysis; 2) middle molecules larger than 500 Da such as parathyroid hormone (PTH),  $\beta_2$  macroglobulin, and c-reactive protein (CRP), which can be removed by peritoneal dialysis or high-flux hemodialysis or hemofiltration; and 3) protein-bound molecules such as phenolic and indolic compounds, homocysteine (Hcy) that are difficult to remove via hemodialysis or hemofiltration.<sup>5</sup> Recent studies showed that the occurrence of death in ESRD patients is closely associated with the low efficiency of removing middle molecule and protein-bound toxins by using the conventional dialysis therapies.<sup>6-12</sup>

Hemoperfusion allows for the removal of uremic toxins by direct contact with activated charcoal or resin via adsorption and has been one of the preferred methods to enhance poison clearance in intoxication in the clinical practice. Clinical applications of various models of extracorporeal blood purification technologies with the high-to-low clearance rates of large-molecular-weight and protein-bound uremic toxins are in the following order: hemoperfusion > bio-artificial kidney > hemodiafiltration > hemofiltration > hemodialysis.<sup>13, 14</sup> Results from previous small-scaled trials demonstrated that hemoperfusion combined with hemodialysis, conducted by adding a commercially available hemoperfusion apparatus to the dialysis circuit in series with a standard hemodialyzer, is an effective approach to remove not only small water-soluble solutes, but also for middle molecule and protein-bound uremic toxins such as inflammatory cytokines and advanced glycation end products.<sup>13-17</sup> Based on the above results, we hypothesized that

1  
2  
3 hemodialysis plus hemoperfusion may plausibly improve clinical outcomes of hemodialysis  
4 patients, and thus, in this HD/HPvsHD trial, we outlined the first clinical trial to observe whether  
5 hemoperfusion combined with hemodialysis is superior to hemodialysis alone in the  
6 improvement of survival by significantly reducing the 24-month all-cause and cardiovascular  
7 mortality in MHD patients compared with those receiving hemodialysis treatment alone.  
8  
9

### 13 **Objectives**

14  
15 The primary outcome of the HD/HPvsHD trial is to test if hemodialysis plus hemoperfusion  
16 treatment is superior to regular hemodialysis treatment alone in reducing all-cause mortality in  
17 MHD patients. We hypothesize that patients receiving hemodialysis plus hemoperfusion  
18 treatment have lower rate of all-cause mortality than those receiving hemodialysis alone. The  
19 secondary outcome is to test if hemoperfusion combined with hemodialysis treatment is superior  
20 to regular hemodialysis treatment in terms of reducing cardiovascular-related mortality and  
21 major cardiovascular events (MACEs) as well as improving the quality of life.  
22  
23  
24  
25  
26  
27  
28

### 29 **Study design**

30  
31 The study will be conducted as a multi-center, open-label, randomized controlled trial. The study  
32 will consist of a 1-month run-in period and a 24-month period of intervention and follow-up. The  
33 study flow is summarized in Figure 1.  
34  
35  
36  
37

### 38 **Eligibility criteria**

39 Patients must meet all of the following criteria are eligible:

- 40 1) Age at 18-75 years old
- 41 2) Regular blood purification treatment at least 3 months before enrolled in this study
- 42 3) Standard  $Kt/V \geq 1.2$

43  
44  
45  
46  
47  
48  
49 Subjects with one of more of the following conditions will be excluded:

- 50 1) Life expectancy <1 year
  - 51 2) White blood cell count  $< 4 \times 10^9/L$  and / or platelet count  $< 100 \times 10^9/L$
  - 52 3) Cerebral hemorrhage in the past 12 weeks
- 53  
54  
55  
56  
57  
58  
59  
60

- 4) MACEs in the past 8 weeks
- 5) Severe heart failure (New York Heart Association [NYHA] class III or IV)<sup>18</sup>
- 6) Active gastrointestinal bleeding, or coagulation dysfunction
- 7) Malignant tumor
- 8) Active infection
- 9) Pregnancy or lactation
- 10) Participating in clinical trials in the past 3 months
- 11) Mental disabilities

### Sample size calculation

Sample size calculation is based on the following assumptions: 1)  $\alpha$  (2-sided) at 0.05; 1)  $1-\beta$  at 80%; 3) 18% 24-month all-cause mortality in the control arm (subjects receiving hemodialysis and hemodiafiltration only);<sup>1, 2</sup> 4) a reduction of 24-month all-cause mortality by 30% (to 12.6%). Expecting a 15% attrition rate, a total of 682 patients per arm is needed, thus a total of 1364 patients will be needed in this HD/HPvsHD trial.

### Randomization and treatment

MHD patients treated in 11 centers across Shanghai, China who met the inclusion criteria will be enrolled into the study. After signing the informed consent, as shown in Table 1., in the 1-month run-in period, the baseline clinical data will be obtained and then patients will be randomized into two treatment arms: experimental group (hemodialysis plus hemoperfusion treatment group) and control group (hemodialysis treatment group). Subjects will be allocated to the 2 arms with a 1:1 ratio using simple randomization. Randomization sequence will be generated by the Clinical Research Unit of Xin Hua Hospital, and distributed to each of the participating centres using opaque envelopes for concealment.

Patients randomized to the control group will receive low-flux hemodialysis treatment at a frequency of 2 times a week and online-hemodiafiltration treatment at a frequency of once a week, with each treatment session lasting 4 hours. In the experiment group, in addition to the treatments in the control arm, hemoperfusion will be conducted once every two weeks using a HA130 resin hemoperfusion apparatus containing 130ml resin. During the treatment session,



1  
2  
3 patients receiving hemodialysis and hemoperfusion for the first 2hrs using a HA130 resin  
4 hemoperfusion apparatus containing 130ml resin (Zhuhai Jafron Biomedical Co., Ltd, China)  
5 and the blood flow rate maintains between 150-200ml/min. After 2hrs when the hemoperfusion  
6 apparatus was depleted, the hemoperfusion cartridge will be removed and the blood went  
7 through the low-flux hemodialysis dialyzer alone for the rest 2hrs with the blood flow rate  
8 between 200-250ml/min (Figure 2). The dialysate flow rate was 500 ml/min. Heparin, weighing  
9 0.3-0.5mg/kg at the initial 10min and 4-6mg/30min thereafter until the end of treatment session  
10 was used. Online-hemodiafiltration will be conducted in the post-dilution mode and the volume  
11 of replacement fluid prescription will be 15-20L.  
12  
13  
14  
15  
16  
17  
18  
19

### 20 **Data collection and management**

21 Clinical data including medical history, physical examination, dialysis regimen, dialysis  
22 adequacy determined by standard Kt/V, electrocardiogram (ECG), chest x-ray, echocardiography,  
23 heart function rating, the quality of life assessed by the Kidney Disease Quality of Life Short  
24 Form (KDQOL-SF),<sup>19</sup> blood routines, liver function, kidney function and other biochemical  
25 index of patients will be recorded in an electronic case report file (eCRF) at a secure encrypted  
26 database by Viedoc Electronic Data Capture (EDC), which enables an audit trail and is certified  
27 by the Good clinical practice (GCP). After verification of the recorded data to source data by one  
28 of the executive investigators, recorded data in the eCRF by Viedoc EDC will be exported to an  
29 STATA file for further statistical analysis. After the completion of the study, the study database  
30 will be locked and data are archived for 10 years in accordance with local policy.  
31  
32  
33  
34  
35  
36  
37  
38

39 Records will be kept on the occurrence of adverse events, time and cause of patients missing the  
40 interview, newly onset or recurrent cardiovascular events and the patients' death. The adverse  
41 events are categorized according to the international conference on harmonization guidelines.<sup>20,</sup>  
42

43 <sup>21</sup> An outline of the study visits and examinations to be performed is shown in Table 1.  
44  
45  
46  
47

### 48 **Data analysis**

49 For data analysis, categorical variables will be analyzed using the  $\chi^2$  or Fisher's exact test.  
50 Continuous variables will be analyzed using Student's *t*-test upon normal distribution, or the  
51 Mann-Whitney *U*-test otherwise. Primary outcomes will be analyzed using the Kaplan-Meier  
52 method followed by the log-rank test. Multivariate Cox regression will be used to analyzed  
53  
54  
55  
56  
57  
58  
59  
60

1  
2  
3 factors that could influence all-cause mortality and CVD mortality after the adjustment for  
4 multiple relevant traditional and uremia-related risk factors for mortality. Data were analyzed on  
5 an intention-to-treat basis. All statistical analyses will be conducted using STATA (Version 14.0;  
6 Stata Corporation, College Station, Texas, US).  
7  
8  
9

### 10 11 12 **Ethics and dissemination**

13 The protocol has been approved by Ethical Committee of eleven participating centres and has  
14 been assigned the following protocol ID: NCT03227770. Substantive protocol amendments will  
15 be reported, reviewed and approved by the local medical ethical committee before application.  
16 Results of this study will be presented at national and international scientific meetings, and  
17 publications will be submitted to peer-reviewed journals.  
18  
19  
20  
21  
22

### 23 24 **Discussion**

25 There are several unique features of the HD/HPvsHD trial compared with prior trials of  
26 combined hemoperfusion and hemodialysis. The HD/HPvsHD trial is the first clinical trial that  
27 uses mortality as the primary outcome in ESRD patients receiving hemodialysis plus  
28 hemoperfusion versus hemodialysis alone. As hemoperfusion combined with conventional  
29 hemodialysis is an effective approach to remove not only small water-soluble solutes, but also  
30 for middle molecule and protein-bound uremic toxins, it may plausibly improve patient  
31 prognosis, thus we hypothesized that the combination treatment of hemodialysis plus  
32 hemoperfusion might reduce all-cause mortality of MHD patients. Secondly, the strength of the  
33 proposed study includes relatively long follow-up (24-month), large sample size (n=1,364), and  
34 multi centres representing a major Metropolitan area in China.  
35  
36  
37  
38  
39  
40  
41  
42

43 The design of this study has the limitation that we only select several representative middle  
44 molecules and protein-bound uremic toxins such as iPTH, hsCRP,  $\beta$ 2-microglobulin and  
45 homocysteine and tested the removal efficiency of these uremic toxins by both treatment arms.  
46 Testing for protein-bound uremic toxins such as phenolic and indolic compounds are unavailable  
47 in the clinical setting, which is one main limitation of this study. Additionally, hemoperfusion  
48 treatment will have potential complications and side effects such as transient leukopenia, minor  
49 reduction in fibrinogen and fibronectin and blood reactions to biocompatible materials.  
50  
51  
52  
53  
54  
55  
56  
57  
58  
59  
60

In summary, the HD/HPvsHD trial will present an opportunity to assessing the efficacy of hemodialysis plus hemoperfusion in improving the survival of MHD patients. Results from this trial may provide guidance to the optimization of blood purification therapy in MHD patients.

### **Acknowledgements**

The authors thank the study participants, trial staff, and investigators for their participation. Principle investigators at the clinical sites are listed below according to the number of patients in each site: Geng-Ru Jiang from Xin Hua Hospital affiliated to Shanghai Jiao Tong University School of Medicine; Xiao-Qiang Ding from Zhong Shan Hospital affiliated to Fudan University; Zhao-Hui Ni from Renji Hospital affiliated to Shanghai Jiao Tong University School of Medicine; Xiao-Nong Chen from Rui Jin Hospital affiliated to Shanghai Jiao Tong University School of Medicine; Wei-Jie Yuan from Shanghai First People's Hospital affiliated of Shanghai Jiao Tong University; Nian-Song Wang from Shanghai Sixth People's Hospital affiliated to Shanghai Jiao Tong University; Zhi-Yong Guo from Chang Hai Hospital affiliated to Second Military Medical University; Feng Ding from Shanghai Ninth People's Hospital affiliated to Shanghai Jiao Tong University School of Medicine; Yue-Yi Deng from Long Hua Hospital affiliated to Shanghai University of Traditional Chinese Medicine; Chen Yu from Shanghai Tongji Hospital affiliated to Tongji University School of Medicine; Rong Zhou from Yangpu Hospital affiliated to Tongji University School of Medicine.

### **Authors' contributions**

Wei Lu and Geng-Ru Jiang were involved in conception and trial design and in drafting of the article.

### **Funding**

The HD/HPvsHD trial is being funded by Shanghai Hospital Development Center (Grant No. 16CR1021A).

### **Competing interests statement**

None.

---

## References

1. Matsushita K, Van der Velde M, Astor BC, *et al.* Association of estimated glomerular filtration rate and albuminuria with all-cause and cardiovascular mortality in general population cohorts: a collaborative meta-analysis. *Lancet* 2010; **375**:2073–81.
2. U.S. Renal Data System, USRDS 2017 Annual Data Report.
3. Hanafusa N, Nakai S, Iseki K, Tsubakihara Y. Japanese Society for Dialysis Therapy Renal Data Registry: A window through which we can view the details of Japanese dialysis population. *Kidney Int Suppl* 2015; **5**: 15–22.
4. Moradi H, Sica DA, Kalantarzadeh K. Cardiovascular burden associated with uremic toxins in patients with chronic kidney disease. *Am J Nephrol* 2013; **38**:136–48.
5. Vanholder R, De Smet R, Glorieux G, *et al.* Review on uremic toxins: classification, concentration, and interindividual variability. *Kidney Int* 2003; **63**: 1934–43.
6. Vanholder R, Van Laecke S, Glorieux G. What is new in uremic toxicity? *Pediatr Nephrol* 2008; **23**: 1211–21.
7. Lesaffer G, De SR, Lameire N, *et al.* Intradialytic removal of protein-bound uraemic toxins: role of solute characteristics and of dialyser membrane. *Nephrol Dial Transplant* 2000; **15**: 50–7.
8. London GM, Marty C, Marchais SJ, *et al.* Arterial calcifications and bone histomorphometry in end-stage renal disease. *J Am Soc Nephrol* 2004; **15**: 1943–51.
9. Furuya R, Kumagai H, Miyata T, *et al.* High plasma pentosidine level is accompanied with cardiovascular events in hemodialysis patients. *Clin Exp Nephrol* 2012; **16**: 421–6.
10. Vanholder R, Schepers E, Pletinck A, *et al.* An update on protein-bound uremic retention solutes. *J Ren Nutr* 2012; **22**: 90–4.
11. Bammens B, Evenepoel P, Verbeke K, *et al.* Removal of the protein-bound solute p-cresol by convective transport: a randomized crossover study. *Am J Kidney Dis* 2004; **44**: 278–85.

12. Mandolfo S, Borlandelli S, Imbasciati E. Leptin and beta 2-microglobulin kinetics with three different dialysis modalities. *Int J Artif Organs* 2006; **29**: 949-55.
13. Chen SJ, Jiang GR, Shan JP, *et al.* Combination of maintenance hemodialysis with hemoperfusion: a safe and effective model of artificial kidney. *Int J Artif Organs* 2011; **34**: 339–47.
14. Li W H, Yin Y M, Chen H, *et al.* Curative effect of neutral macroporous resin hemoperfusion on treating hemodialysis patients with refractory uremic pruritus. *Medicine* 2017; **96**: e6160.
15. Raine A, Cordonnier D, Ritz E. Effect of hemodialysis plus hemoperfusion on insulin resistance and nutritional status of patients with end-stage diabetic nephropathy. *J Int Transl Med* 2015; **51**: 180–4.
16. Zhang J, Yuan Y, An X, *et al.* Comparison of combined blood purification techniques in treatment of dialysis patients with uraemic pruritus. *Int J Clin Exp Med* 2016; **9**: 8563–8.
17. Zhang Y, Mei CL, Rong S, *et al.* Effect of the combination of hemodialysis and hemoperfusion on clearing advanced glycation end products: A prospective, randomized, two-stage crossover trial in patients under maintenance hemodialysis. *Blood Purif* 2015; **40**: 127–32.
18. The Criteria Committee of the New York Heart Association. Nomenclature and criteria for diagnosis of diseases of the heart and blood vessels. Boston: Little Brown, 1964.
19. Hays RD, Kallich JD, Mapes DL, *et al.* Kidney Disease Quality of Life Short Form (KDQOL-SF), Version 1.3: A manual for use and scoring. Santa Monica, CA: RAND, 1997.
20. International Conference on Harmonisation. Clinical safety data management: definitions and standards for expedited reporting E2A. International Conference on Harmonisation; 1994.
21. International Conference on Harmonisation. Post-approval safety data management: definitions and standards for expedited reporting E2D. International Conference on

---

1  
2  
3 Harmonisation; 2003.  
4  
5  
6  
7  
8  
9  
10  
11  
12  
13  
14  
15  
16  
17  
18  
19  
20  
21  
22  
23  
24  
25  
26  
27  
28  
29  
30  
31  
32  
33  
34  
35  
36  
37  
38  
39  
40  
41  
42  
43  
44  
45  
46  
47  
48  
49  
50  
51  
52  
53  
54  
55  
56  
57  
58  
59  
60

For peer review only

## Tables

Table 1. Study visits of the HD/HPvsHD trial

|                                    | V1  | V2 | V3     | V4     | V5      | V6      | V7      |
|------------------------------------|-----|----|--------|--------|---------|---------|---------|
|                                    | -1M | 0M | 3M±14d | 6M±14d | 12M±14d | 18M±14d | 24M±14d |
| Consent form                       | ×   |    |        |        |         |         |         |
| Medical history                    | ×   | ×  | ×      | ×      | ×       | ×       | ×       |
| Physical examination               | ×   | ×  | ×      | ×      | ×       | ×       | ×       |
| Eligibility                        |     | ×  |        |        |         |         |         |
| Dialysis regimen                   | ×   | ×  | ×      | ×      | ×       | ×       | ×       |
| Blood routine and coagulation test | ×   | ×  | ×      | ×      | ×       | ×       | ×       |
| *Blood chemistry                   | ×   |    |        | ×      | ×       | ×       | ×       |
| Serum iPTH                         | ×   |    |        | ×      | ×       | ×       | ×       |
| Serum hsCRP                        | ×   |    |        | ×      | ×       | ×       | ×       |
| Serum $\beta_2$ -MG                | ×   |    |        | ×      | ×       | ×       | ×       |
| Serum Hcy                          | ×   |    |        | ×      | ×       | ×       | ×       |
| Standard Kt/V                      | ×   |    |        | ×      | ×       | ×       | ×       |
| electrocardiogram                  | ×   |    |        |        | ×       |         | ×       |
| Chest X-ray                        | ×   |    |        |        | ×       |         | ×       |
| Echocardiography                   | ×   |    |        |        | ×       |         | ×       |
| Heart function rating              | ×   | ×  | ×      | ×      | ×       | ×       | ×       |
| KDQOL-SF                           |     | ×  |        |        | ×       |         | ×       |
| Adjustment of dialysis regimen     |     | ×  | ×      | ×      | ×       | ×       | ×       |
| Comorbidity                        | ×   | ×  | ×      | ×      | ×       | ×       | ×       |
| Medications                        | ×   | ×  | ×      | ×      | ×       | ×       | ×       |
| Adverse events                     |     | ×  | ×      | ×      | ×       | ×       | ×       |

\*: Blood chemistry include liver function series (total bilirubin, direct bilirubin, alanine aminotransferase, aspartate aminotransferase, serum total protein, albumin,  $\gamma$ -glutamyltransferase and alkaline phosphatase), renal functions (blood urea nitrogen and creatinine), electrolytes (sodium, potassium, calcium and phosphate), glucose, creatinine kinase and its isoform CK-MB, troponin I, myohemoglobin, lactate dehydrogenase,  $\alpha$ -hydroxybutyrate dehydrogenase, pro b-type natriuretic peptide.

---

**Figure legends**

Figure 1. Study flow diagram of the HD/HPvsHD trial.

Figure 2. The schematic diagram of hemodialysis plus hemoperfusion treatment.

For peer review only



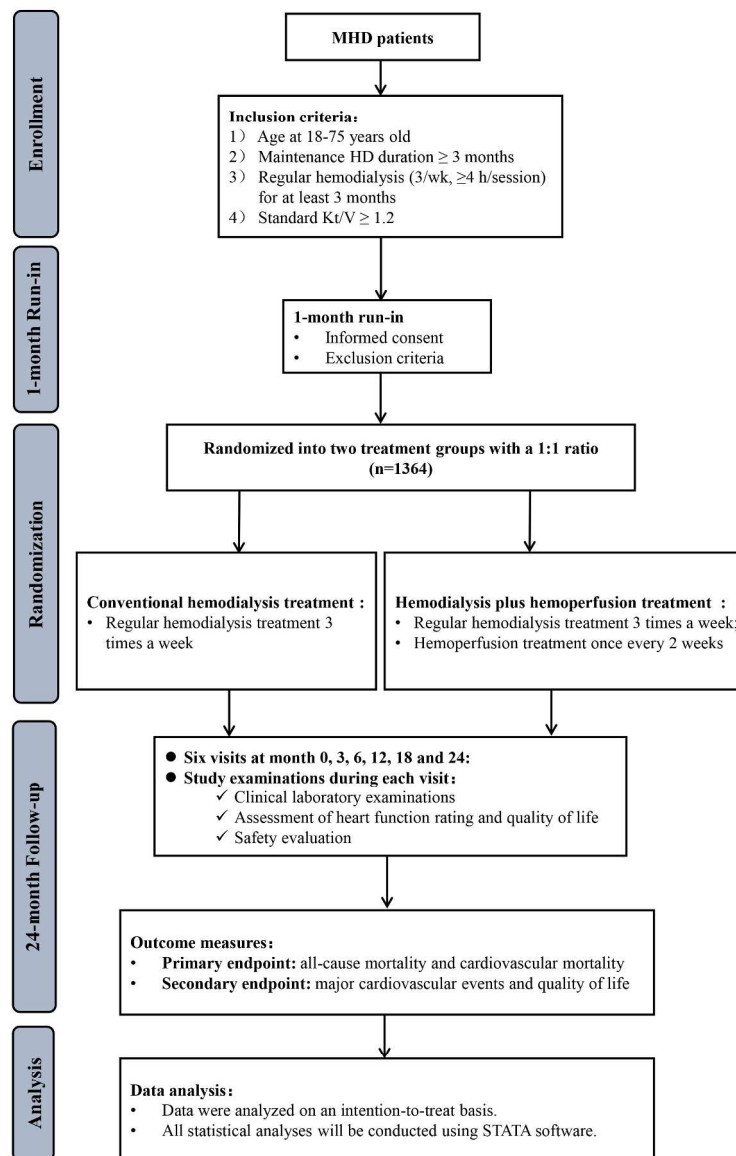

Figure 1. Study flow diagram of the HD/HPvsHD trial.

190x302mm (300 x 300 DPI)

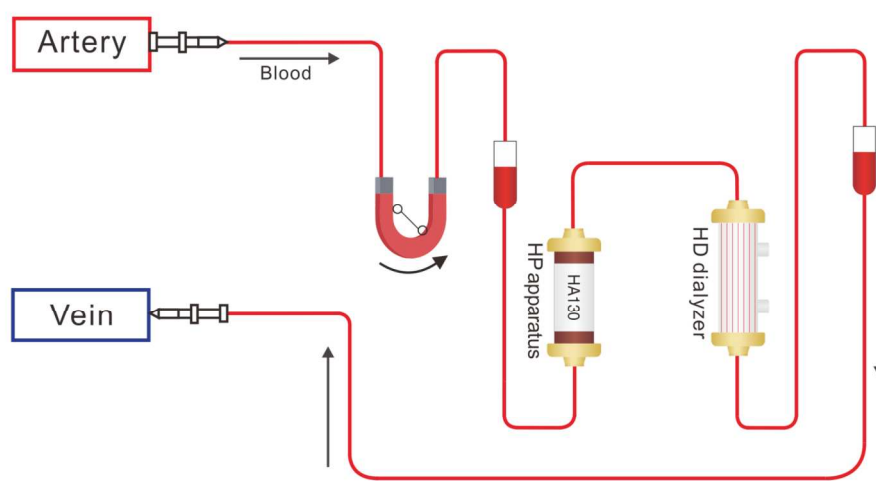

Figure 2. The schematic diagram of hemodialysis plus hemoperfusion treatment.

190x101mm (300 x 300 DPI)

# BMJ Open

**A randomized, open-label, multi-centre trial comparing hemodialysis plus hemoperfusion versus hemodialysis alone in adult patients with end-stage renal disease (HD/HPvsHD): study protocol**

|                                 |                                                                                                                                                                                                                                                                                                                       |
|---------------------------------|-----------------------------------------------------------------------------------------------------------------------------------------------------------------------------------------------------------------------------------------------------------------------------------------------------------------------|
| Journal:                        | <i>BMJ Open</i>                                                                                                                                                                                                                                                                                                       |
| Manuscript ID                   | bmjopen-2018-022169.R1                                                                                                                                                                                                                                                                                                |
| Article Type:                   | Protocol                                                                                                                                                                                                                                                                                                              |
| Date Submitted by the Author:   | 23-Apr-2018                                                                                                                                                                                                                                                                                                           |
| Complete List of Authors:       | Lu, Wei; Xin Hua Hospital affiliated to Shanghai Jiao Tong University School of Medicine, Renal Division, Department of Internal Medicine Jiang, Geng-Ru; Xin Hua Hospital affiliated to Shanghai Jiao Tong University School of Medicine, Renal Division, Department of Internal Medicine the HD/HPvsHD, trial Group |
| <b>Primary Subject Heading</b>: | Cardiovascular medicine                                                                                                                                                                                                                                                                                               |
| Secondary Subject Heading:      | Renal medicine                                                                                                                                                                                                                                                                                                        |
| Keywords:                       | hemodialysis, hemoperfusion, mortality                                                                                                                                                                                                                                                                                |
|                                 |                                                                                                                                                                                                                                                                                                                       |

SCHOLARONE™  
Manuscripts

Only

1  
2  
3 1 A randomized, open-label, multi-centre trial comparing hemodialysis plus  
4  
5 2 hemoperfusion versus hemodialysis alone in adult patients with end-stage renal  
6  
7 3 disease (HD/HPvsHD): study protocol  
8

9 4 **Wei Lu<sup>1\*</sup>, Geng-Ru Jiang<sup>1</sup>, and the HD/HPvsHD trial Group**  
10  
11 5

12 6 <sup>1</sup> Renal Division, Department of Internal Medicine, Xin Hua Hospital Affiliated to Shanghai Jiao  
13  
14 7 Tong University School of Medicine, Shanghai 200092, China.  
15  
16 8

17  
18 9 **\* Address correspondence to:**

19  
20 10 Wei Lu, MD, Renal Division, Department of Internal Medicine, Xin Hua Hospital affiliated to  
21  
22 11 Shanghai Jiao Tong University School of Medicine, Shanghai 200092, China.

23 12 Tel: 86-21-25077783

24  
25 13 E-mail: luwei03@xinhumed.com.cn  
26  
27 14

28  
29 15 Wei Lu and Geng-Ru Jiang contributed equally to this paper.  
30  
31 16  
32 17  
33 18  
34 19  
35 20  
36 21  
37 22  
38 23  
39 24  
40 25  
41 26  
42 27  
43 28  
44 29  
45 30  
46  
47  
48  
49  
50  
51  
52  
53  
54  
55  
56  
57  
58  
59  
60

## 31 **ABSTRACT**

32 **Introduction** Hemodialysis (HD) is the cornerstone treatment for end-stage renal disease (ESRD)  
33 patients. However, highly protein-bound or large molecular weight uremic toxins such as  
34 phenolic and indolic compounds and homocysteine, which are associated with adverse outcomes  
35 such as cardiovascular disease of ESRD patients, are difficult to remove via HD but can be  
36 effectively eliminated by hemoperfusion (HP). The proposed trial (referred to as HD/HPvsHD  
37 below) is a randomized, open-label, multi-centre trial comparing HD plus HP versus HD alone in  
38 adult patients with ESRD. The primary endpoint measure is all-cause mortality.

39 **Methods and analysis** We plan to enroll 1364 maintenance hemodialysis patients from eleven  
40 medical centers in Shanghai. Participants will be randomized to receive HD plus HP or HD alone  
41 at a 1:1 ratio after 1-month run-in period. In both arms, patients will receive low-flux HD at a  
42 frequency of 2 times a week and hemodiafiltration (HDF) at a frequency of once a week. In the  
43 intervention group, subjects also received HP once every two weeks. Follow-up is scheduled at 3,  
44 6, 12, 18, and 24 months after randomization, and will consist the following: routine physical  
45 examinations, standard lab panels (blood routine, liver / residual kidney functions, tests of the  
46 coagulation system, etc.), dialysis adequacy (standard Kt/V), chest X-ray, electrocardiogram,  
47 echocardiography, heart function rating. Adverse events will be assessed according to the  
48 international conference on harmonization guidelines. The primary outcome is 24-month all-  
49 cause mortality. Secondary outcomes will include cardiovascular-related mortality, the  
50 occurrence of major cardiovascular events and the quality of life.

51 **Ethics and dissemination** The study protocol has been approved by the Ethical Committees of  
52 all eleven participating centres. Clinical Research Unit of Xin Hua Hospital will oversee the  
53 study. The results will be presented at national and international academic meetings, and  
54 submitted to peer-reviewed journals for publications.

55 **Trial registration numbers** ClinicalTrials.gov Identifier: NCT03227770

56 **Protocol version identifier** 2.0

### 57 **Strengths and limitations of this study**

- 58 ● The HD/HPvsHD trial is the first clinical trial that uses mortality as the primary outcome in  
59 ESRD patients receiving HD plus HP versus HD alone.
- 60 ● The strength of the proposed study includes relatively long follow-up (24-month), large  
61 sample size (n=1,364) and multiple centres representing a major Metropolitan area in China.

- 
- 1  
2  
3 62 ● A major weakness of the proposed study is the estimation of uremic toxin removal  
4 63 efficiency using only standard tests (e.g., iPTH, hsCRP,  $\alpha_2$ -macroglobulin and  
5 64 homocysteine). Many relevant protein-bound uremic toxins, including phenolic and indolic  
6 65 compounds, will not be measured (due to practical issues).  
7  
8  
9  
10 66  
11  
12 67  
13 68  
14 69  
15 70  
16 71  
17 72  
18 73  
19 74  
20 75  
21 76  
22 77  
23 78  
24 79  
25 80  
26 81  
27 82  
28 83  
29 84  
30 85  
31 86  
32 87  
33 88  
34 89  
35 90  
36 91 |  
37 92  
38  
39  
40  
41  
42  
43  
44  
45  
46  
47  
48  
49  
50  
51  
52  
53  
54  
55  
56  
57  
58  
59  
60

## 93 Introduction

94 Despite the advance in blood purification technology and pharmacological treatment, mortality  
95 rates of end-stage renal disease (ESRD) patients undergoing renal replacement treatment  
96 including hemodialysis (HD) and peritoneal dialysis remain high. Cardiovascular disease (CVD)  
97 is the leading cause of death in maintenance hemodialysis (MHD) patients.<sup>1</sup> According to the  
98 U.S. Renal Data System (USRD), although the mortality rate of MHD patients has dropped by  
99 26% between 1993 and 2012, there was no significant decrease in death caused by CVD.<sup>2</sup> In  
100 Japan, the Japanese society for dialysis therapy renal data registry reported that CVD mortality  
101 accounts for nearly 40% of all causes of mortality.<sup>3</sup>

102 There are emerging evidences suggesting that uremic toxins are associated with significant  
103 morbidity and mortality in ESRD patients.<sup>4</sup> Based on the physicochemical properties, the  
104 European Uremic Toxin Work Group classified uremic toxins into three major categories: 1)  
105 small, water-soluble molecules such as urea and creatinine, which can be efficiently removed by  
106 hemodialysis; 2) middle molecules larger than 500 Da such as parathyroid hormone (PTH),  $\beta$ 2-  
107 macroglobulin, and c-reactive protein (CRP), which can be removed by peritoneal dialysis or  
108 high-flux hemodialysis or hemofiltration; and 3) protein-bound molecules such as phenolic and  
109 indolic compounds, homocysteine (Hcy) that are difficult to remove via HD or hemofiltration.<sup>5</sup>  
110 Recent studies showed that the occurrence of death in ESRD patients is closely associated with  
111 the low efficiency of removing middle molecule and protein-bound toxins by using the  
112 conventional dialysis therapies.<sup>6-12</sup>

113 Hemoperfusion (HP) allows for the removal of uremic toxins by direct contact with activated  
114 charcoal or resin via adsorption and has been one of the preferred methods to enhance poison  
115 clearance in intoxication in the clinical practice. Clinical applications of various models of  
116 extracorporeal blood purification technologies with the high-to-low clearance rates of large-  
117 molecular-weight and protein-bound uremic toxins are in the following order: hemoperfusion >  
118 bio-artificial kidney > hemodiafiltration > hemofiltration > hemodialysis.<sup>13, 14</sup> Results from  
119 previous small-scaled trials demonstrated that HP combined with HD, conducted by adding a  
120 commercially available hemoperfusion apparatus to the dialysis circuit in series with a standard  
121 hemodialyzer, is an effective approach to remove not only small water-soluble solutes, but also  
122 for middle molecule and protein-bound uremic toxins such as inflammatory cytokines and  
123 advanced glycation end products.<sup>13-17</sup> Based on the above results, we hypothesized that HD plus

HP may plausibly improve clinical outcomes of hemodialysis patients, and thus, in this HD/HPvsHD trial, we outlined the first clinical trial to observe whether HP combined with HD is superior to HD alone in the improvement of survival by significantly reducing the 24-month all-cause and cardiovascular mortality in MHD patients compared with those receiving HD alone.

### Objectives

The primary outcome of the HD/HPvsHD trial is to test if HD plus HP treatment is superior to regular HD alone in reducing all-cause mortality in MHD patients. We hypothesize that patients receiving HD plus HP treatment have lower rate of all-cause mortality than those receiving HD alone. The secondary outcome is to test if HD plus HP treatment is superior to regular HD treatment in terms of reducing cardiovascular-related mortality and major cardiovascular events (MACEs) as well as improving the quality of life.

### Study design

The study will be conducted as a multi-center, open-label, randomized controlled trial. The study will consist of a 1-month run-in period and a 24-month period of intervention and follow-up. The study flow is summarized in Figure 1.

### Eligibility criteria

Patients must meet all of the following criteria are eligible:

- 1) Age at 18-75 years old;
- 2) Regular blood purification treatment at least 3 months before enrolled in this study;
- 3) Standard Kt/V  $\geq 1.2$ .

Subjects with one of more of the following conditions will be excluded:

- 1) White blood cell count  $< 4 \times 10^9/L$  and / or platelet count  $< 100 \times 10^9/L$ ;
- 2) Cerebral hemorrhage in the past 12 weeks;
- 3) MACEs in the past 8 weeks;
- 4) Severe heart failure (New York Heart Association [NYHA] class III or IV);<sup>18</sup>
- 5) Active gastrointestinal bleeding, or coagulation dysfunction;
- 6) Malignant tumor;



- 155 7) Active infection;
- 156 8) Pregnancy or lactation;
- 157 9) Participating in clinical trials in the past 3 months;
- 158 10) Mental disabilities.

159

### 160 **Sample size calculation**

161 Sample size calculation is based on the following assumptions: 1)  $\alpha$  (2-sided) at 0.05; 1)  $1-\beta$  at  
162 80%; 3) 18% 24-month all-cause mortality in the control arm;<sup>1, 2</sup> 4) a reduction of 24-month all-  
163 cause mortality by 30% (to 12.6%). Expecting a 15% attrition rate, a total of 682 patients per arm  
164 is needed, thus a total of 1364 patients will be needed in this HD/HPvsHD trial. There are  
165 currently around 2000 MHD patients meeting eligibility criteria in total in the eleven  
166 participating centers of this HD/HPvsHD trial, which demonstrated that we are capable to  
167 achieving adequate participant enrolment to reach target sample size.

168

### 169 **Randomization and treatment**

170 MHD patients treated in 11 centers across Shanghai, China who met the inclusion criteria will be  
171 enrolled into the study. After signing the informed consent, as shown in Table 1., in the 1-month  
172 run-in period, the baseline clinical data will be obtained and then patients will be randomized  
173 into two treatment arms: experimental group (HD plus HP treatment group) and control group  
174 (HD treatment group). Subjects will be allocated to the 2 arms with a 1:1 ratio using simple  
175 randomization. Randomization sequence will be generated by the statistics research section (SRS)  
176 of the Clinical Research Unit of Xin Hua Hospital, and distributed to each of the participating  
177 centres using opaque envelopes for concealment.

178 Patients randomized to the control group will receive low-flux HD treatment at a frequency of 2  
179 times a week and online-hemodiafiltration (HDF) treatment at a frequency of once a week, with  
180 each treatment session lasting 4 hours. In the experiment group, in addition to the treatments in  
181 the control arm, HP will be conducted once every two weeks using a HA130 resin  
182 hemoperfusion apparatus containing 130ml resin. During the treatment session, patients  
183 receiving HD and HP for the first 2hrs using a HA130 resin hemoperfusion apparatus containing  
184 130ml resin (Zhuhai Jafron Biomedical Co., Ltd, China) and the blood flow rate maintains  
185 between 150-200ml/min. After 2 hours when the HP apparatus was depleted, the HP cartridge

1  
2  
3 186 will be removed and the blood went through the low-flux HD dialyzer alone for the rest 2 hours  
4  
5 187 with the blood flow rate between 200-250ml/min (Figure 2). The dialysate flow rate was 500  
6  
7 188 ml/min. Heparin, weighing 0.3-0.5mg/kg at the initial 10min and 4-6mg/30min thereafter until  
8  
9 189 the end of treatment session was used. Online-HDF will be conducted in the post-dilution mode  
10  
11 190 and the volume of replacement fluid prescription will be 15-20L.

12 191

### 13 192 **Data collection and management**

15 193 Clinical data including medical history, physical examination, dialysis regimen, dialysis  
16  
17 194 adequacy determined by standard Kt/V, electrocardiogram (ECG), chest x-ray, echocardiography,  
18  
19 195 heart function rating, the quality of life assessed by the Kidney Disease Quality of Life Short  
20  
21 196 Form (KDQOL-SF),<sup>19</sup> blood routines, liver function, residual kidney function<sup>20</sup> and other  
22  
23 197 biochemical index of patients will be recorded in an electronic case report file (eCRF) at a secure  
24  
25 198 encrypted database by Viedoc Electronic Data Capture (EDC), which enables an audit trail and is  
26  
27 199 certified by the Good Clinical Practice (GCP). An outline of the study visits and examinations to  
28  
29 200 be performed is shown in Table 1.

29 201 After verification of the recorded data to source data by the data monitoring committee (DMC),  
30  
31 202 recorded data in the eCRF by Viedoc EDC will be exported to an STATA file for further  
32  
33 203 statistical analysis. Any missing data, data out of pre-limits and possible duplication for each end  
34  
35 204 point will be queried and internally validated by the DMC before locking the database. The  
36  
37 205 DMC is independent of the study investigators and has no competing interests. After the  
38  
39 206 completion of the study, the study database will be locked and data are archived for 10 years in  
40  
41 207 accordance with local policy. Records will be kept on the occurrence of adverse events, time and  
42  
43 208 cause of patients missing the interview, newly onset or recurrent cardiovascular events and the  
44  
45 209 patients' death. An interim analysis will be performed on primary end-point when half of the  
46  
47 210 patients have been randomized and have completed the 24-month follow-up. The interim  
48  
49 211 analysis will be performed by the Clinical Research Unit of Xin Hua Hospital, who has no  
50  
51 212 competing interests, and will decide whether to continue with the trial.

52 213

### 53 214 **Adverse events monitoring**

53 215 The adverse events (AE) are categorized according to the international conference on  
54  
55 216 harmonization guidelines.<sup>21, 22</sup> The causal relationship to study drug is determined by the

1  
2  
3 217 physician. All AEs will be collected and recorded after the patient has provided consent and is  
4  
5 218 included in the trial. An AE which meets the criteria for a serious adverse event (SAE) between  
6  
7 219 study enrolment and hospital discharge will be reported to the DMC and trial management  
8  
9 220 committee within 24 hours. An SAE report should be completed for any event where doubt  
10  
11 221 exists regarding its status of seriousness. All SAEs should be followed to resolution or  
12  
13 222 stabilization. Non-serious AEs should be followed to resolution or stabilization, or reported as  
14  
15 223 SAEs if they become serious. Follow-up is also required for non-serious AEs that cause  
16  
17 224 interruption or discontinuation of study drug. If patients suffer harm as a result of their  
18  
19 225 participation in the trial, there will receive free treatment and sufficient compensation.  
20  
21 226

### 227 **Data analysis**

22 228 For data analysis, categorical variables will be analyzed using the  $\chi^2$  or Fisher's exact test.  
23  
24 229 Continuous variables will be analyzed using Student's *t*-test upon normal distribution, or the  
25  
26 230 Mann-Whitney *U*-test otherwise. Primary outcomes will be analyzed using the Kaplan-Meier  
27  
28 231 method followed by the log-rank test. Multivariate Cox regression will be used to analyzed  
29  
30 232 factors that could influence all-cause mortality and CVD mortality after the adjustment for  
31  
32 233 multiple relevant traditional and uremia-related risk factors for mortality. Data were analyzed on  
33  
34 234 an intention-to-treat basis. All statistical analyses will be conducted using STATA (Version 14.0;  
35  
36 235 Stata Corporation, College Station, Texas, US).  
37  
38 236

### 39 237 **Patient and Public Involvement**

40 238 The study participants were not involved beyond the standard roles as the subjects of the  
41  
42 239 proposed trial. The public was not involved.  
43  
44 240

### 45 241 **Ethics and dissemination**

46 242 The protocol has been approved by Ethical Committee of eleven participating centres and has  
47  
48 243 been assigned the following protocol ID: NCT03227770. Substantive protocol amendments will  
49  
50 244 be reported, reviewed and approved by the local medical ethical committee before application.  
51  
52 245 The study may be subject to inspection and audit by Clinical Research Unit of Xin Hua Hospital  
53  
54 246 to ensure adherence to the guidelines of GCP. The frequency of monitoring visits will be  
55  
56  
57  
58  
59  
60

247 determined by the site enrolment rate. On study completion, the study monitor will conduct a  
248 study termination visit.

249 Results of this study will be presented at national and international scientific meetings, and  
250 publications will be submitted to peer-reviewed journals.

### 251 **Consent and confidentiality**

252 This trial will be performed in accordance with the Declaration of Helsinki. Each patient will  
253 need to agree with a fully informed consent form and sign it. All laboratory specimens, data  
254 collection, reports, administrative forms and the process itself will be identified by a coded ID to  
255 maintain patient confidentiality. All records that include the name or personal identifier will be  
256 stored separately from records identified by ID. Datasets on the website will be protected by  
257 password. The principal investigators will need to sign agreements to maintain the  
258 confidentiality of all patients. Study information relating to any patient will not be released  
259 externally without the written permission of the patient.

### 260 **Discussion**

261 There are several unique features of the HD/HPvsHD trial compared with prior trials of  
262 combined hemoperfusion and hemodialysis. The HD/HPvsHD trial is the first clinical trial that  
263 uses mortality as the primary outcome in ESRD patients receiving HD plus HP treatment versus  
264 receiving HD treatment alone. As HD combined with HP is an effective approach to remove not  
265 only small water-soluble solutes, but also for middle molecule and protein-bound uremic toxins,  
266 it may plausibly improve patient prognosis, thus we hypothesized that the combination treatment  
267 of HD plus HP might reduce all-cause mortality of MHD patients. Secondly, the strengths of the  
268 proposed study include relatively long follow-up (24-month), large sample size (n=1,364) and  
269 multiple centres representing a major Metropolitan area in China.

270 The design of this study has the limitation that we only select several representative middle  
271 molecules and protein-bound uremic toxins such as iPTH, hsCRP,  $\beta$ 2-microglobulin and  
272 homocysteine and tested the removal efficiency of these uremic toxins by both treatment arms.  
273 Testing for protein-bound uremic toxins such as phenolic and indolic compounds are unavailable  
274 in the clinical setting, which is one main limitation of this study. Additionally, HP treatment will  
275 have potential complications and side effects such as transient leukocytopenia and

1  
2  
3 276 thrombocytopenia, minor reduction in fibrinogen and fibronectin and blood reactions to  
4  
5 277 biocompatible materials.<sup>23</sup> Thus, in the experiment group, in addition to the HD treatments in the  
6  
7 278 control arm, HP will be added once every two weeks. Third, due to the higher cost (both HD-  
8  
9 279 related equipment and accessories) associated with high-flux HD, low-flux HD twice weekly  
10  
11 280 plus HDF once weekly is a widely-used protocol across China. Thus, the results of the proposed  
12  
13 281 trial must be interpreted with caution when extrapolating to US and Europe, where the  
14  
15 282 conventional protocol is high-flux HD 3 times per week. Regardless, the results of the proposed  
16  
17 283 trial will provide useful information that could potentially change the medical practice in the US  
18  
19 284 and Europe if additional trials are conducted in subjects receiving high-flux HD 3 times per week.  
20  
21 285 In summary, the HD/HPvsHD trial will present an opportunity to assessing the efficacy of  
22  
23 286 hemodialysis plus hemoperfusion in improving the survival of MHD patients. Results from this  
24  
25 287 trial may provide guidance to the optimization of blood purification therapy in MHD patients.  
26  
27 288

### 289 **Acknowledgements**

290 The authors thank the study participants, trial staff, and investigators for their participation.  
291 Principle investigators at the clinical sites are listed below according to the number of patients in  
292 each site: Geng-Ru Jiang from Xin Hua Hospital affiliated to Shanghai Jiao Tong University  
293 School of Medicine; Xiao-Qiang Ding from Zhong Shan Hospital affiliated to Fudan University;  
294 Zhao-Hui Ni from Renji Hospital affiliated to Shanghai Jiao Tong University School of  
295 Medicine; Xiao-Nong Chen from Rui Jin Hospital affiliated to Shanghai Jiao Tong University  
296 School of Medicine; Wei-Jie Yuan from Shanghai First People's Hospital affiliated of Shanghai  
297 Jiao Tong University; Nian-Song Wang from Shanghai Sixth People's Hospital affiliated to  
298 Shanghai Jiao Tong University; Zhi-Yong Guo from Chang Hai Hospital affiliated to Second  
299 Military Medical University; Feng Ding from Shanghai Ninth People's Hospital affiliated to  
300 Shanghai Jiao Tong University School of Medicine; Yue-Yi Deng from Long Hua Hospital  
301 affiliated to Shanghai University of Traditional Chinese Medicine; Chen Yu from Shanghai  
302 Tongji Hospital affiliated to Tongji University School of Medicine; Rong Zhou from Yangpu  
303 Hospital affiliated to Tongji University School of Medicine.

304  
305  
306

---

1  
2  
3 307 **Authors' contributions**

4  
5 308 Wei Lu and Geng-Ru Jiang were involved in conception and trial design and in drafting of the  
6  
7 309 article. The HD/HPvsHD trial Group were participating in the trial.

8  
9 310

10 311 **Funding**

11  
12 312 The HD/HPvsHD trial is being funded by Shanghai Hospital Development Center (Grant No.  
13  
14 313 16CR1021A).

15 314

16  
17 315 **Competing interests statement**

18  
19 316 There are no competing interests for any author.

20  
21 317

22 318 **References**

23  
24 319 1. Matsushita K, Van der Velde M, Astor BC, *et al.* Association of estimated glomerular filtration  
25  
26 320 rate and albuminuria with all-cause and cardiovascular mortality in general population cohorts: a  
27  
28 321 collaborative meta-analysis. *Lancet* 2010; **375**:2073–81.

29  
30 322 2. U.S. Renal Data System, USRDS 2017 Annual Data Report.

31  
32  
33 323 3. Hanafusa N, Nakai S, Iseki K, Tsubakihara Y. Japanese Society for Dialysis Therapy Renal  
34  
35 324 Data Registry: A window through which we can view the details of Japanese dialysis population.  
36  
37 325 *Kidney Int Suppl* 2015; **5**: 15–22.

38  
39  
40 326 4. Moradi H, Sica DA, Kalantarzadeh K. Cardiovascular burden associated with uremic toxins in  
41  
42 327 patients with chronic kidney disease. *Am J Nephrol* 2013; **38**:136–48.

43  
44  
45 328 5. Vanholder R, De Smet R, Glorieux G, *et al.* Review on uremic toxins: classification,  
46  
47 329 concentration, and interindividual variability. *Kidney Int* 2003; **63**: 1934–43.

48  
49 330 6. Vanholder R, Van Laecke S, Glorieux G. What is new in uremic toxicity? *Pediatr Nephrol*  
50  
51 331 2008; **23**: 1211–21.

52  
53  
54 332 7. Lesaffer G, De SR, Lameire N, *et al.* Intradialytic removal of protein-bound uraemic toxins:

- 1  
2  
3 333 role of solute characteristics and of dialyser membrane. *Nephrol Dial Transplant* 2000; **15**: 50–7.  
4  
5 334 8. London GM, Marty C, Marchais SJ, *et al*. Arterial calcifications and bone histomorphometry  
6  
7 335 in end-stage renal disease. *J Am Soc Nephrol* 2004; **15**: 1943–51.  
8  
9 336 9. Furuya R, Kumagai H, Miyata T, *et al*. High plasma pentosidine level is accompanied with  
10  
11 337 cardiovascular events in hemodialysis patients. *Clin Exp Nephrol* 2012; **16**: 421–6.  
12  
13 338 10. Vanholder R, Schepers E, Pletinck A, *et al*. An update on protein-bound uremic retention  
14  
15 339 solutes. *J Ren Nutr* 2012; **22**: 90–4.  
16  
17 340 11. Bammens B, Evenepoel P, Verbeke K, *et al*. Removal of the protein-bound solute p-cresol by  
18  
19 341 convective transport: a randomized crossover study. *Am J Kidney Dis* 2004; **44**: 278–85.  
20  
21 342 12. Mandolfo S, Borlandelli S, Imbasciati E. Leptin and beta 2-microglobulin kinetics with three  
22  
23 343 different dialysis modalities. *Int J Artif Organs* 2006; **29**: 949-55.  
24  
25 344 13. Chen SJ, Jiang GR, Shan JP, *et al*. Combination of maintenance hemodialysis with  
26  
27 345 hemoperfusion: a safe and effective model of artificial kidney. *Int J Artif Organs* 2011; **34**: 339–  
28  
29 346 47.  
30  
31 347 14. Li W H, Yin Y M, Chen H, *et al*. Curative effect of neutral macroporous resin hemoperfusion  
32  
33 348 on treating hemodialysis patients with refractory uremic pruritus. *Medicine* 2017; **96**: e6160.  
34  
35 349 15. Raine A, Cordonnier D, Ritz E. Effect of hematodialysis plus hemoperfusion on insulin  
36  
37 350 resistance and nutritional status of patients with end-stage diabetic nephropathy. *J Int Transl Med*  
38  
39 351 2015; **51**: 180–4.  
40  
41 352 16. Zhang J, Yuan Y, An X, *et al*. Comparison of combined blood purification techniques in  
42  
43 353 treatment of dialysis patients with uraemic pruritus. *Int J Clin Exp Med* 2016; **9**: 8563–8.  
44  
45 354 17. Zhang Y, Mei CL, Rong S, *et al*. Effect of the combination of hemodialysis and  
46  
47 355 hemoperfusion on clearing advanced glycation end products: A prospective, randomized, two-  
48  
49  
50  
51  
52  
53  
54  
55  
56  
57  
58  
59



- 1  
2  
3 356 stage crossover trial in patients under maintenance hemodialysis. *Blood Purif* 2015; **40**: 127–32.  
4  
5 357 18. The Criteria Committee of the New York Heart Association. Nomenclature and criteria for  
6  
7 358 diagnosis of diseases of the heart and blood vessels. Boston: Little Brown, 1964.  
9  
10 359 19. Hays RD, Kallich JD, Mapes DL, et al. Kidney Disease Quality of Life Short Form  
11  
12 360 (KDQOL-SF), Version 1.3: A manual for use and scoring. Santa Monica, CA: RAND, 1997.  
13  
14 361 20. Obi Y, Rhee CM, Mathew AT, et al. Residual Kidney Function Decline and Mortality in  
15  
16 362 Incident Hemodialysis Patients. *J Am Soc Nephrol* 2016; **27**: 3758-68.  
18  
19 363 21. International Conference on Harmonisation. Clinical safety data management: definitions and  
20  
21 364 standards for expedited reporting E2A. International Conference on Harmonisation; 1994.  
22  
23 365 22. International Conference on Harmonisation. Post-approval safety data management:  
24  
25 366 definitions and standards for expedited reporting E2D. International Conference on  
26  
27 367 Harmonisation; 2003.  
28  
29 368 23. Ghannoum M, Bouchard J, Nolin TD. Hemoperfusion for the treatment of poisoning:  
30  
31 369 technology, determinants of poison clearance, and application in clinical practice. *Semin Dial*  
32  
33 370 2014, **27**: 350-61.  
34  
35  
36  
37  
38  
39  
40  
41  
42  
43  
44  
45  
46  
47  
48  
49  
50  
51  
52  
53  
54  
55  
56  
57  
58  
59  
60



373 **Tables**

374 Table 1. Study visits of the HD/HPvsHD trial

|                                       | V1  | V2 | V3     | V4     | V5      | V6      | V7      |
|---------------------------------------|-----|----|--------|--------|---------|---------|---------|
|                                       | -1M | 0M | 3M±14d | 6M±14d | 12M±14d | 18M±14d | 24M±14d |
| 10 Consent form                       | ×   |    |        |        |         |         |         |
| 11 Medical history                    | ×   | ×  | ×      | ×      | ×       | ×       | ×       |
| 13 Physical examination               | ×   | ×  | ×      | ×      | ×       | ×       | ×       |
| 14 Eligibility                        |     | ×  |        |        |         |         |         |
| 16 Dialysis regimen                   | ×   | ×  | ×      | ×      | ×       | ×       | ×       |
| 17 Blood routine and coagulation test | ×   | ×  | ×      | ×      | ×       | ×       | ×       |
| 19 *Blood chemistry                   | ×   |    |        | ×      | ×       | ×       | ×       |
| 20 Residual kidney function           | ×   |    |        |        |         |         |         |
| 22 Serum iPTH                         | ×   |    |        | ×      | ×       | ×       | ×       |
| 23 Serum hsCRP                        | ×   |    |        | ×      | ×       | ×       | ×       |
| 25 Serum $\beta_2$ -microglobulin     | ×   |    |        | ×      | ×       | ×       | ×       |
| 26 Serum Hcysteine                    | ×   |    |        | ×      | ×       | ×       | ×       |
| 28 Standard Kt/V                      | ×   |    |        | ×      | ×       | ×       | ×       |
| 29 electrocardiogram                  | ×   |    |        |        | ×       |         | ×       |
| 31 Chest X-ray                        | ×   |    |        |        | ×       |         | ×       |
| 32 Echocardiography                   | ×   |    |        |        | ×       |         | ×       |
| 34 Heart function rating              | ×   | ×  | ×      | ×      | ×       | ×       | ×       |
| 35 KDQOL-SF                           |     | ×  |        |        | ×       |         | ×       |
| 37 Adjustment of dialysis regimen     |     | ×  | ×      | ×      | ×       | ×       | ×       |
| 38 Comorbidity                        | ×   | ×  | ×      | ×      | ×       | ×       | ×       |
| 40 Medications                        | ×   | ×  | ×      | ×      | ×       | ×       | ×       |
| 41 Adverse events                     |     | ×  | ×      | ×      | ×       | ×       | ×       |

375 \*: Blood chemistry include liver function series (total bilirubin, direct bilirubin, alanine  
 376 aminotransferase, aspartate aminotransferase, serum total protein, albumin,  $\gamma$ -  
 377 glutamyltransferase and alkaline phosphatase), serum blood urea nitrogen and creatinine,  
 378 electrolytes (sodium, potassium, calcium and phosphate), glucose, creatinine kinase and its  
 379 isoform CK-MB, troponin I, myohemoglobin, lactate dehydrogenase,  $\square\square$ hydroxybutyrate  
 380 dehydrogenase, pro b-type natriuretic peptide.

381

382

1  
2  
3  
4  
5  
6  
7  
8  
9  
10  
11  
12  
13  
14  
15  
16  
17  
18  
19  
20  
21  
22  
23  
24  
25  
26  
27  
28  
29  
30  
31  
32  
33  
34  
35  
36  
37  
38  
39  
40  
41  
42  
43  
44  
45  
46  
47  
48  
49  
50  
51  
52  
53  
54  
55  
56  
57  
58  
59  
60

383

384 **Figure legends**

385 Figure 1. Study flow diagram of the HD/HPvsHD trial.

386 Figure 2. A schematic diagram of hemodialysis plus hemoperfusion treatment.

For peer review only

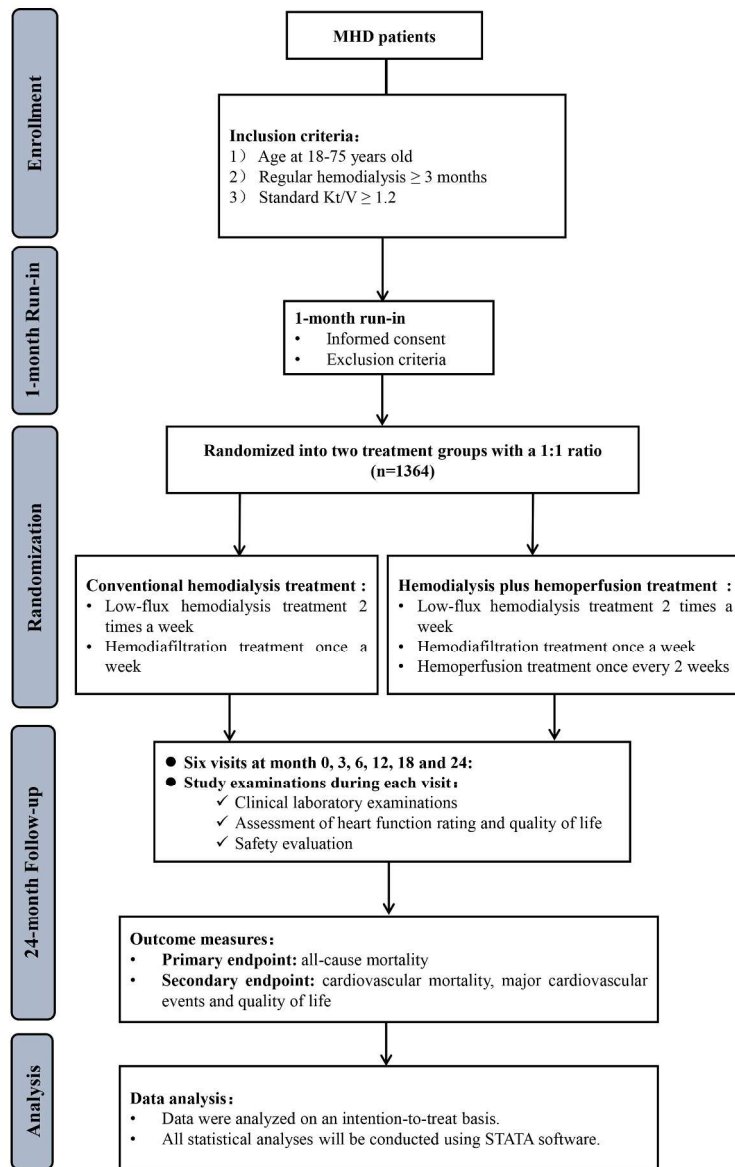

Study flow diagram of the HD/HPvsHD trial.

190x299mm (300 x 300 DPI)

1  
2  
3  
4  
5  
6  
7  
8  
9  
10  
11  
12  
13  
14  
15  
16  
17  
18  
19  
20  
21  
22  
23  
24  
25  
26  
27  
28  
29  
30  
31  
32  
33  
34  
35  
36  
37  
38  
39  
40  
41  
42  
43  
44  
45  
46  
47  
48  
49  
50  
51  
52  
53  
54  
55  
56  
57  
58  
59  
60

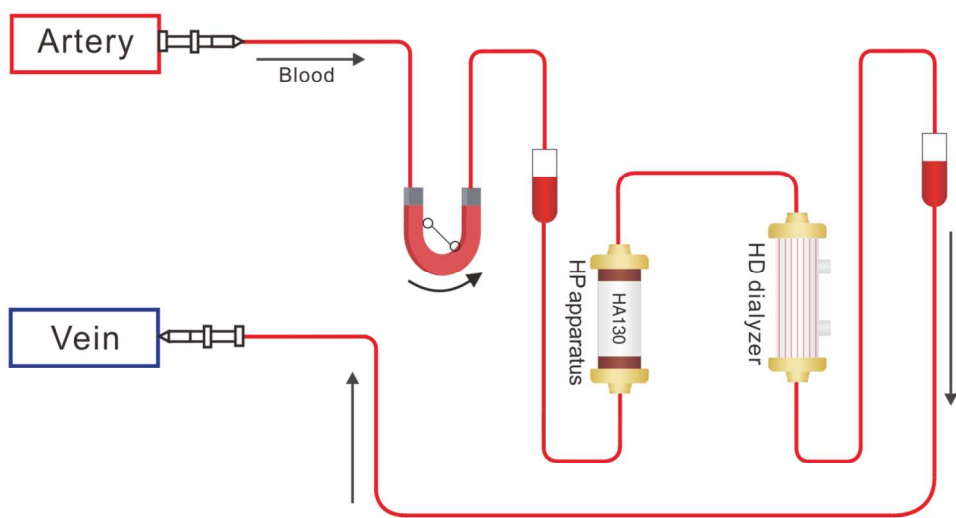

A schematic diagram of hemodialysis plus hemoperfusion treatment.

175x100mm (300 x 300 DPI)

Review only

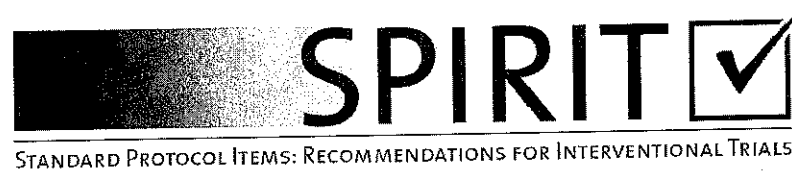

## SPIRIT 2013 Checklist: Recommended items to address in a clinical trial protocol and related documents\*

| Section/item                      | Item No | Description                                                                                                                                                                                                                                                                              | Addressed on page number |
|-----------------------------------|---------|------------------------------------------------------------------------------------------------------------------------------------------------------------------------------------------------------------------------------------------------------------------------------------------|--------------------------|
| <b>Administrative information</b> |         |                                                                                                                                                                                                                                                                                          |                          |
| Title                             | 1       | Descriptive title identifying the study design, population, interventions, and, if applicable, trial acronym                                                                                                                                                                             | <u>Line 1</u>            |
| Trial registration                | 2a      | Trial identifier and registry name. If not yet registered, name of intended registry                                                                                                                                                                                                     | <u>Line 122</u>          |
|                                   | 2b      | All items from the World Health Organization Trial Registration Data Set                                                                                                                                                                                                                 | <u>N/A</u>               |
| Protocol version                  | 3       | Date and version identifier                                                                                                                                                                                                                                                              | <u>Line 123</u>          |
| Funding                           | 4       | Sources and types of financial, material, and other support                                                                                                                                                                                                                              | <u>Line 471-473</u>      |
| Roles and responsibilities        | 5a      | Names, affiliations, and roles of protocol contributors                                                                                                                                                                                                                                  | <u>Line 4, Line 15</u>   |
|                                   | 5b      | Name and contact information for the trial sponsor                                                                                                                                                                                                                                       | <u>Line 471-473</u>      |
|                                   | 5c      | Role of study sponsor and funders, if any, in study design; collection, management, analysis, and interpretation of data; writing of the report; and the decision to submit the report for publication, including whether they will have ultimate authority over any of these activities | <u>Line 467-469</u>      |
|                                   | 5d      | Composition, roles, and responsibilities of the coordinating centre, steering committee, endpoint adjudication committee, data management team, and other individuals or groups overseeing the trial, if applicable (see Item 21a for data monitoring committee)                         | <u>Line 58-61</u>        |

## Introduction

### Background and rationale

6a Description of research question and justification for undertaking the trial, including summary of relevant studies (published and unpublished) examining benefits and harms for each intervention

line 159-188

6b Explanation for choice of comparators

line 180-188

### Objectives

7 Specific objectives or hypotheses

line 188-197

### Trial design

8 Description of trial design including type of trial (eg, parallel group, crossover, factorial, single group), allocation ratio, and framework (eg, superiority, equivalence, noninferiority, exploratory)

line 199-205

## Methods: Participants, interventions, and outcomes

### Study setting

9 Description of study settings (eg, community clinic, academic hospital) and list of countries where data will be collected. Reference to where list of study sites can be obtained

line 280-283

### Eligibility criteria

10 Inclusion and exclusion criteria for participants. If applicable, eligibility criteria for study centres and individuals who will perform the interventions (eg, surgeons, psychotherapists)

line 212-274

### Interventions

11a Interventions for each group with sufficient detail to allow replication, including how and when they will be administered

line 285-323

11b Criteria for discontinuing or modifying allocated interventions for a given trial participant (eg, drug dose change in response to harms, participant request, or improving/worsening disease)

N/A

11c Strategies to improve adherence to intervention protocols, and any procedures for monitoring adherence (eg, drug tablet return, laboratory tests)

line 282-283

11d Relevant concomitant care and interventions that are permitted or prohibited during the trial

N/A

### Outcomes

12 Primary, secondary, and other outcomes, including the specific measurement variable (eg, systolic blood pressure), analysis metric (eg, change from baseline, final value, time to event), method of aggregation (eg, median, proportion), and time point for each outcome. Explanation of the clinical relevance of chosen efficacy and harm outcomes is strongly recommended

line 199-205

### Participant timeline

13 Time schedule of enrolment, interventions (including any run-ins and washouts), assessments, and visits for participants. A schematic diagram is highly recommended (see Figure)

line 285-323, Figure 2

|    |                                                                     |     |                                                                                                                                                                                                                                                                                                                                                                                                              |                         |
|----|---------------------------------------------------------------------|-----|--------------------------------------------------------------------------------------------------------------------------------------------------------------------------------------------------------------------------------------------------------------------------------------------------------------------------------------------------------------------------------------------------------------|-------------------------|
| 1  | Sample size                                                         | 14  | Estimated number of participants needed to achieve study objectives and how it was determined, including clinical and statistical assumptions supporting any sample size calculations                                                                                                                                                                                                                        | <u>line 276-283</u>     |
| 2  |                                                                     |     |                                                                                                                                                                                                                                                                                                                                                                                                              |                         |
| 3  |                                                                     |     |                                                                                                                                                                                                                                                                                                                                                                                                              |                         |
| 4  | Recruitment                                                         | 15  | Strategies for achieving adequate participant enrolment to reach target sample size                                                                                                                                                                                                                                                                                                                          | <u>line 282-283</u>     |
| 5  |                                                                     |     |                                                                                                                                                                                                                                                                                                                                                                                                              |                         |
| 6  |                                                                     |     |                                                                                                                                                                                                                                                                                                                                                                                                              |                         |
| 7  | <b>Methods: Assignment of interventions (for controlled trials)</b> |     |                                                                                                                                                                                                                                                                                                                                                                                                              |                         |
| 8  | Allocation:                                                         |     |                                                                                                                                                                                                                                                                                                                                                                                                              |                         |
| 9  |                                                                     |     |                                                                                                                                                                                                                                                                                                                                                                                                              |                         |
| 10 |                                                                     |     |                                                                                                                                                                                                                                                                                                                                                                                                              |                         |
| 11 | Sequence generation                                                 | 16a | Method of generating the allocation sequence (eg, computer-generated random numbers), and list of any factors for stratification. To reduce predictability of a random sequence, details of any planned restriction (eg, blocking) should be provided in a separate document that is unavailable to those who enrol participants or assign interventions                                                     | <u>line 290-293</u>     |
| 12 |                                                                     |     |                                                                                                                                                                                                                                                                                                                                                                                                              |                         |
| 13 |                                                                     |     |                                                                                                                                                                                                                                                                                                                                                                                                              |                         |
| 14 |                                                                     |     |                                                                                                                                                                                                                                                                                                                                                                                                              |                         |
| 15 |                                                                     |     |                                                                                                                                                                                                                                                                                                                                                                                                              |                         |
| 16 | Allocation concealment mechanism                                    | 16b | Mechanism of implementing the allocation sequence (eg, central telephone; sequentially numbered, opaque, sealed envelopes), describing any steps to conceal the sequence until interventions are assigned                                                                                                                                                                                                    | <u>line 290-293</u>     |
| 17 |                                                                     |     |                                                                                                                                                                                                                                                                                                                                                                                                              |                         |
| 18 |                                                                     |     |                                                                                                                                                                                                                                                                                                                                                                                                              |                         |
| 19 |                                                                     |     |                                                                                                                                                                                                                                                                                                                                                                                                              |                         |
| 20 |                                                                     |     |                                                                                                                                                                                                                                                                                                                                                                                                              |                         |
| 21 | Implementation                                                      | 16c | Who will generate the allocation sequence, who will enrol participants, and who will assign participants to interventions                                                                                                                                                                                                                                                                                    | <u>line 290-298</u>     |
| 22 |                                                                     |     |                                                                                                                                                                                                                                                                                                                                                                                                              |                         |
| 23 |                                                                     |     |                                                                                                                                                                                                                                                                                                                                                                                                              |                         |
| 24 | Blinding (masking)                                                  | 17a | Who will be blinded after assignment to interventions (eg, trial participants, care providers, outcome assessors, data analysts), and how                                                                                                                                                                                                                                                                    | <u>N/A (open-label)</u> |
| 25 |                                                                     |     |                                                                                                                                                                                                                                                                                                                                                                                                              |                         |
| 26 |                                                                     |     |                                                                                                                                                                                                                                                                                                                                                                                                              |                         |
| 27 |                                                                     | 17b | If blinded, circumstances under which unblinding is permissible, and procedure for revealing a participant's allocated intervention during the trial                                                                                                                                                                                                                                                         | <u>N/A (open-label)</u> |
| 28 |                                                                     |     |                                                                                                                                                                                                                                                                                                                                                                                                              |                         |
| 29 |                                                                     |     |                                                                                                                                                                                                                                                                                                                                                                                                              |                         |
| 30 |                                                                     |     |                                                                                                                                                                                                                                                                                                                                                                                                              |                         |
| 31 | <b>Methods: Data collection, management, and analysis</b>           |     |                                                                                                                                                                                                                                                                                                                                                                                                              |                         |
| 32 |                                                                     |     |                                                                                                                                                                                                                                                                                                                                                                                                              |                         |
| 33 | Data collection methods                                             | 18a | Plans for assessment and collection of outcome, baseline, and other trial data, including any related processes to promote data quality (eg, duplicate measurements, training of assessors) and a description of study instruments (eg, questionnaires, laboratory tests) along with their reliability and validity, if known. Reference to where data collection forms can be found, if not in the protocol | <u>line 326-333</u>     |
| 34 |                                                                     |     |                                                                                                                                                                                                                                                                                                                                                                                                              |                         |
| 35 |                                                                     |     |                                                                                                                                                                                                                                                                                                                                                                                                              |                         |
| 36 |                                                                     |     |                                                                                                                                                                                                                                                                                                                                                                                                              |                         |
| 37 |                                                                     |     |                                                                                                                                                                                                                                                                                                                                                                                                              |                         |
| 38 |                                                                     | 18b | Plans to promote participant retention and complete follow-up, including list of any outcome data to be collected for participants who discontinue or deviate from intervention protocols                                                                                                                                                                                                                    | <u>N/A</u>              |
| 39 |                                                                     |     |                                                                                                                                                                                                                                                                                                                                                                                                              |                         |
| 40 |                                                                     |     |                                                                                                                                                                                                                                                                                                                                                                                                              |                         |
| 41 |                                                                     |     |                                                                                                                                                                                                                                                                                                                                                                                                              |                         |
| 42 |                                                                     |     |                                                                                                                                                                                                                                                                                                                                                                                                              |                         |
| 43 |                                                                     |     |                                                                                                                                                                                                                                                                                                                                                                                                              |                         |
| 44 |                                                                     |     |                                                                                                                                                                                                                                                                                                                                                                                                              |                         |
| 45 |                                                                     |     |                                                                                                                                                                                                                                                                                                                                                                                                              |                         |
| 46 |                                                                     |     |                                                                                                                                                                                                                                                                                                                                                                                                              |                         |

|    |                                 |     |                                                                                                                                                                                                                                                                                                                                       |                                                |
|----|---------------------------------|-----|---------------------------------------------------------------------------------------------------------------------------------------------------------------------------------------------------------------------------------------------------------------------------------------------------------------------------------------|------------------------------------------------|
| 1  | Data management                 | 19  | Plans for data entry, coding, security, and storage, including any related processes to promote data quality (eg, double data entry; range checks for data values). Reference to where details of data management procedures can be found, if not in the protocol                                                                     | <u>line 334 - 338</u>                          |
| 2  |                                 |     |                                                                                                                                                                                                                                                                                                                                       |                                                |
| 3  |                                 |     |                                                                                                                                                                                                                                                                                                                                       |                                                |
| 4  |                                 |     |                                                                                                                                                                                                                                                                                                                                       |                                                |
| 5  | Statistical methods             | 20a | Statistical methods for analysing primary and secondary outcomes. Reference to where other details of the statistical analysis plan can be found, if not in the protocol                                                                                                                                                              | <u>line 376-383</u>                            |
| 6  |                                 |     |                                                                                                                                                                                                                                                                                                                                       |                                                |
| 7  |                                 |     |                                                                                                                                                                                                                                                                                                                                       |                                                |
| 8  |                                 | 20b | Methods for any additional analyses (eg, subgroup and adjusted analyses)                                                                                                                                                                                                                                                              | <u>N/A</u>                                     |
| 9  |                                 |     |                                                                                                                                                                                                                                                                                                                                       |                                                |
| 10 |                                 | 20c | Definition of analysis population relating to protocol non-adherence (eg, as randomised analysis), and any statistical methods to handle missing data (eg, multiple imputation)                                                                                                                                                       | <u>line 376-383</u>                            |
| 11 |                                 |     |                                                                                                                                                                                                                                                                                                                                       |                                                |
| 12 |                                 |     |                                                                                                                                                                                                                                                                                                                                       |                                                |
| 13 |                                 |     |                                                                                                                                                                                                                                                                                                                                       |                                                |
| 14 | <b>Methods: Monitoring</b>      |     |                                                                                                                                                                                                                                                                                                                                       |                                                |
| 15 |                                 |     |                                                                                                                                                                                                                                                                                                                                       |                                                |
| 16 | Data monitoring                 | 21a | Composition of data monitoring committee (DMC); summary of its role and reporting structure; statement of whether it is independent from the sponsor and competing interests; and reference to where further details about its charter can be found, if not in the protocol. Alternatively, an explanation of why a DMC is not needed | <u>line <sup>334</sup><del>334</del> - 338</u> |
| 17 |                                 |     |                                                                                                                                                                                                                                                                                                                                       |                                                |
| 18 |                                 |     |                                                                                                                                                                                                                                                                                                                                       |                                                |
| 19 |                                 |     |                                                                                                                                                                                                                                                                                                                                       |                                                |
| 20 |                                 |     |                                                                                                                                                                                                                                                                                                                                       |                                                |
| 21 |                                 | 21b | Description of any interim analyses and stopping guidelines, including who will have access to these interim results and make the final decision to terminate the trial                                                                                                                                                               | <u>line 342-345</u>                            |
| 22 |                                 |     |                                                                                                                                                                                                                                                                                                                                       |                                                |
| 23 |                                 |     |                                                                                                                                                                                                                                                                                                                                       |                                                |
| 24 | Harms                           | 22  | Plans for collecting, assessing, reporting, and managing solicited and spontaneously reported adverse events and other unintended effects of trial interventions or trial conduct                                                                                                                                                     | <u>line 348 - 373</u>                          |
| 25 |                                 |     |                                                                                                                                                                                                                                                                                                                                       |                                                |
| 26 |                                 |     |                                                                                                                                                                                                                                                                                                                                       |                                                |
| 27 | Auditing                        | 23  | Frequency and procedures for auditing trial conduct, if any, and whether the process will be independent from investigators and the sponsor                                                                                                                                                                                           | <u>line 381-382</u>                            |
| 28 |                                 |     |                                                                                                                                                                                                                                                                                                                                       |                                                |
| 29 |                                 |     |                                                                                                                                                                                                                                                                                                                                       |                                                |
| 30 |                                 |     |                                                                                                                                                                                                                                                                                                                                       |                                                |
| 31 | <b>Ethics and dissemination</b> |     |                                                                                                                                                                                                                                                                                                                                       |                                                |
| 32 |                                 |     |                                                                                                                                                                                                                                                                                                                                       |                                                |
| 33 | Research ethics approval        | 24  | Plans for seeking research ethics committee/institutional review board (REC/IRB) approval                                                                                                                                                                                                                                             | <u>line 386-387.</u>                           |
| 34 |                                 |     |                                                                                                                                                                                                                                                                                                                                       |                                                |
| 35 |                                 |     |                                                                                                                                                                                                                                                                                                                                       |                                                |
| 36 | Protocol amendments             | 25  | Plans for communicating important protocol modifications (eg, changes to eligibility criteria, outcomes, analyses) to relevant parties (eg, investigators, REC/IRBs, trial participants, trial registries, journals, regulators)                                                                                                      | <u>line 387-388</u>                            |
| 37 |                                 |     |                                                                                                                                                                                                                                                                                                                                       |                                                |
| 38 |                                 |     |                                                                                                                                                                                                                                                                                                                                       |                                                |
| 39 |                                 |     |                                                                                                                                                                                                                                                                                                                                       |                                                |
| 40 |                                 |     |                                                                                                                                                                                                                                                                                                                                       |                                                |
| 41 |                                 |     |                                                                                                                                                                                                                                                                                                                                       |                                                |
| 42 |                                 |     |                                                                                                                                                                                                                                                                                                                                       |                                                |
| 43 |                                 |     |                                                                                                                                                                                                                                                                                                                                       |                                                |
| 44 |                                 |     |                                                                                                                                                                                                                                                                                                                                       |                                                |
| 45 |                                 |     |                                                                                                                                                                                                                                                                                                                                       |                                                |
| 46 |                                 |     |                                                                                                                                                                                                                                                                                                                                       |                                                |



|    |                               |     |                                                                                                                                                                                                                                                                                     |                      |
|----|-------------------------------|-----|-------------------------------------------------------------------------------------------------------------------------------------------------------------------------------------------------------------------------------------------------------------------------------------|----------------------|
| 1  | Consent or assent             | 26a | Who will obtain informed consent or assent from potential trial participants or authorised surrogates, and how (see Item 32)                                                                                                                                                        | <u>line 397</u>      |
| 2  |                               |     |                                                                                                                                                                                                                                                                                     |                      |
| 3  |                               |     |                                                                                                                                                                                                                                                                                     |                      |
| 4  |                               | 26b | Additional consent provisions for collection and use of participant data and biological specimens in ancillary studies, if applicable                                                                                                                                               | <u>N/A</u>           |
| 5  |                               |     |                                                                                                                                                                                                                                                                                     |                      |
| 6  |                               |     |                                                                                                                                                                                                                                                                                     |                      |
| 7  | Confidentiality               | 27  | How personal information about potential and enrolled participants will be collected, shared, and maintained in order to protect confidentiality before, during, and after the trial                                                                                                | <u>line 398-400</u>  |
| 8  |                               |     |                                                                                                                                                                                                                                                                                     |                      |
| 9  |                               |     |                                                                                                                                                                                                                                                                                     |                      |
| 10 | Declaration of interests      | 28  | Financial and other competing interests for principal investigators for the overall trial and each study site                                                                                                                                                                       | <u>line 475-478.</u> |
| 11 |                               |     |                                                                                                                                                                                                                                                                                     |                      |
| 12 |                               |     |                                                                                                                                                                                                                                                                                     |                      |
| 13 | Access to data                | 29  | Statement of who will have access to the final trial dataset, and disclosure of contractual agreements that limit such access for investigators                                                                                                                                     | <u>line 334-338</u>  |
| 14 |                               |     |                                                                                                                                                                                                                                                                                     |                      |
| 15 |                               |     |                                                                                                                                                                                                                                                                                     |                      |
| 16 | Ancillary and post-trial care | 30  | Provisions, if any, for ancillary and post-trial care, and for compensation to those who suffer harm from trial participation                                                                                                                                                       | <u>line 372-373</u>  |
| 17 |                               |     |                                                                                                                                                                                                                                                                                     |                      |
| 18 |                               |     |                                                                                                                                                                                                                                                                                     |                      |
| 19 | Dissemination policy          | 31a | Plans for investigators and sponsor to communicate trial results to participants, healthcare professionals, the public, and other relevant groups (eg, via publication, reporting in results databases, or other data sharing arrangements), including any publication restrictions | <u>line 393-394</u>  |
| 20 |                               |     |                                                                                                                                                                                                                                                                                     |                      |
| 21 |                               |     |                                                                                                                                                                                                                                                                                     |                      |
| 22 |                               |     |                                                                                                                                                                                                                                                                                     |                      |
| 23 |                               |     |                                                                                                                                                                                                                                                                                     |                      |
| 24 |                               | 31b | Authorship eligibility guidelines and any intended use of professional writers                                                                                                                                                                                                      | <u>N/A</u>           |
| 25 |                               |     |                                                                                                                                                                                                                                                                                     |                      |
| 26 |                               | 31c | Plans, if any, for granting public access to the full protocol, participant-level dataset, and statistical code                                                                                                                                                                     | <u>line 404-406</u>  |
| 27 |                               |     |                                                                                                                                                                                                                                                                                     |                      |
| 28 | <b>Appendices</b>             |     |                                                                                                                                                                                                                                                                                     |                      |
| 29 |                               |     |                                                                                                                                                                                                                                                                                     |                      |
| 30 | Informed consent materials    | 32  | Model consent form and other related documentation given to participants and authorised surrogates                                                                                                                                                                                  | <u>N/A</u>           |
| 31 |                               |     |                                                                                                                                                                                                                                                                                     |                      |
| 32 |                               |     |                                                                                                                                                                                                                                                                                     |                      |
| 33 | Biological specimens          | 33  | Plans for collection, laboratory evaluation, and storage of biological specimens for genetic or molecular analysis in the current trial and for future use in ancillary studies, if applicable                                                                                      | <u>N/A</u>           |
| 34 |                               |     |                                                                                                                                                                                                                                                                                     |                      |
| 35 |                               |     |                                                                                                                                                                                                                                                                                     |                      |

\*It is strongly recommended that this checklist be read in conjunction with the SPIRIT 2013 Explanation & Elaboration for important clarification on the items. Amendments to the protocol should be tracked and dated. The SPIRIT checklist is copyrighted by the SPIRIT Group under the Creative Commons "Attribution-NonCommercial-NoDerivs 3.0 Unported" license.
