# Supplementary material for: Randomised, open-label, multicentre trial comparing haemodialysis plus haemoperfusion versus haemodialysis alone in adult patients with end-stage renal disease (HD/HP vs HD): study protocol
Source: PubMed Central journal article supplement — BMJ Open. 2018 Jul 28;8(7):e022169. doi: 10.1136/bmjopen-2018-022169 (PMC6067402; doi:10.1136/bmjopen-2018-022169), 2018-07-28
Supplement: bmjopen-2018-022169.reviewer_comments.pdf [file bmjopen-2018-022169.reviewer_comments.pdf]

## PEER REVIEW HISTORY

BMJ Open publishes all reviews undertaken for accepted manuscripts. Reviewers are asked to complete a checklist review form (<http://bmjopen.bmj.com/site/about/resources/checklist.pdf>) and are provided with free text boxes to elaborate on their assessment. These free text comments are reproduced below.

### ARTICLE DETAILS

|                            |                                                                                                                                                                                             |
|----------------------------|---------------------------------------------------------------------------------------------------------------------------------------------------------------------------------------------|
| <b>TITLE (PROVISIONAL)</b> | A randomized, open-label, multi-centre trial comparing hemodialysis plus hemoperfusion versus hemodialysis alone in adult patients with end-stage renal disease (HD/HPvsHD): study protocol |
| <b>AUTHORS</b>             | Lu, Wei; Jiang, Geng-Ru; the HD/HPvsHD, trial Group                                                                                                                                         |

### VERSION 1 – REVIEW

|                        |                                                                                                                                 |
|------------------------|---------------------------------------------------------------------------------------------------------------------------------|
| <b>REVIEWER</b>        | Leonid Feldman<br>Assaf Harofeh Medical Center, Nephrology Department, Sackler Faculty of Medicine, Tel Aviv University, Israel |
| <b>REVIEW RETURNED</b> | 04-Mar-2018                                                                                                                     |

|                         |                                                                                                                                                                                                                                                                                                                                                                                                                                                                                                                                                                                                                                            |
|-------------------------|--------------------------------------------------------------------------------------------------------------------------------------------------------------------------------------------------------------------------------------------------------------------------------------------------------------------------------------------------------------------------------------------------------------------------------------------------------------------------------------------------------------------------------------------------------------------------------------------------------------------------------------------|
| <b>GENERAL COMMENTS</b> | <ol style="list-style-type: none"><li>1. Hemoperfusion for 2 hours once in every 2 weeks in study group will, probably, produce too little change in clinical outcomes. Better evidence of yes or not impact would be shown in addition of hemoperfusion to every HD session.</li><li>2. Hemodialysis protocol seems strange and unusual: low-flux HD twice weekly + HDF once weekly. It would better to do conventional high-flux HD 3 times per week.</li><li>3. Examination of kidney function is mentioned in methods. It seems that the authors mean "residual renal function". This point must be clarified and described.</li></ol> |
|-------------------------|--------------------------------------------------------------------------------------------------------------------------------------------------------------------------------------------------------------------------------------------------------------------------------------------------------------------------------------------------------------------------------------------------------------------------------------------------------------------------------------------------------------------------------------------------------------------------------------------------------------------------------------------|

|                        |                                                    |
|------------------------|----------------------------------------------------|
| <b>REVIEWER</b>        | Dean Markić<br>University Hospital Rijeka, Croatia |
| <b>REVIEW RETURNED</b> | 24-Mar-2018                                        |

|                         |                                                                                                                                                                                                                                                                            |
|-------------------------|----------------------------------------------------------------------------------------------------------------------------------------------------------------------------------------------------------------------------------------------------------------------------|
| <b>GENERAL COMMENTS</b> | Minor revisions: <ol style="list-style-type: none"><li>1. In the abstract, abbreviations are not properly explained, e.g. hemodialysis (HD)...</li><li>2. Excluding criteria will be a life-expectancy &lt;1 year. How authors will done this? By questionnaire?</li></ol> |
|-------------------------|----------------------------------------------------------------------------------------------------------------------------------------------------------------------------------------------------------------------------------------------------------------------------|

### VERSION 1 – AUTHOR RESPONSE

Reviewer: 1

Reviewer Name: Leonid Feldman

Institution and Country: Assaf Harofeh Medical Center, Nephrology Department, Sackler Faculty of Medicine, Tel Aviv University, Israel

Question 1. Hemoperfusion for 2 hours once in every 2 weeks in study group will, probably, produce too little change in clinical outcomes. Better evidence of yes or not impact would be shown in addition of hemoperfusion to every HD session.

Response to the reviewer: After careful consideration of the reviewer question, I decided to use the proposed protocol (hemoperfusion for 2 hours once in every 2 weeks) mainly for 2 reasons. First, hemoperfusion added to every HD session might be associated with more hemoperfusion-related complications, including leukocytopenia, thrombocytopenia as well as a decrease in fibrinogen (added reference 23: Ghannoum M, et al. Semin Dial 2014, 27: 350-61). From the results of our preliminary study which started from 2009, we observed that the incidence of leukocytopenia and thrombocytopenia in patients receiving hemoperfusion once every two weeks were significantly reduced than those receiving hemoperfusion every week. Second, we found that the levels of uremic toxins such as hsCRP and  $\alpha_2$ -macroglobulin in patients receiving hemoperfusion once every two weeks were significantly lower than those only receiving hemodialysis. The efficacy of hemoperfusion at the frequency of once every two weeks were also associated with better blood pressure control and less symptoms such as pruritus. The Discussion section of the manuscript has been expanded to address this issue.

2. Hemodialysis protocol seems strange and unusual: low-flux HD twice weekly + HDF once weekly. It would better to do conventional high-flux HD 3 times per week.

Response to the reviewer: Due to the higher cost (both HD-related equipment and accessories) associated with high-flux HD, low-flux HD twice weekly + HDF once weekly is a widely-used protocol in China. I understand the reviewer concern, and expanded the Discussion Section of the manuscript to alert the readers: the results of the proposed trial must be interpreted with caution when extrapolating to US and Europe, where conventional protocol is high-flux HD 3 times per week. Regardless, the results of the proposed trial will provide useful information that could potentially change the medical practice in the US and Europe if additional trials are conducted in subjects receiving high-flux HD 3 times per week.

3. Examination of kidney function is mentioned in methods. It seems that the authors mean "residual renal function". This point must be clarified and described.

Response to the reviewer: I apologize for the confusion, and have replaced "kidney function" with "residual renal function" under the subheading of "Data collection and management".

Reviewer: 2

Reviewer Name: Dean Markić

Institution and Country: University Hospital Rijeka, Croatia

Minor revisions:

1. In the abstract, abbreviations are not properly explained, e.g. hemodialysis (HD)...

Response to the reviewer: I appreciate the reviewer comment, and revised the entire manuscript carefully. In the revised manuscript, all abbreviations are defined with full terms upon first appearances. I also made sure that no full terms are used upon repeated appearances.

2. Excluding criteria will be a life-expectancy <1 year. How authors will done this? By questionnaire?

Response to the reviewer: I appreciate the comment, and remove this item as the main clinical assessments of life expectancy such as severe heart failure and intractable malignancy have been already included in the exclusion criteria. The trial registration has been revised accordingly.

## VERSION 2 – REVIEW

|                         |                                                                                                          |
|-------------------------|----------------------------------------------------------------------------------------------------------|
| <b>REVIEWER</b>         | Leonid Feldman<br>Assaf Harofeh Medical Center, Sackler faculty of medicine, Tel Aviv University, Israel |
| <b>REVIEW RETURNED</b>  | 25-Apr-2018                                                                                              |
| <b>GENERAL COMMENTS</b> | The authors adequately adressed all the nessesary points and                                             |

|                         |                                                                                                                  |
|-------------------------|------------------------------------------------------------------------------------------------------------------|
|                         | completed the Discussion section appropriately. The manuscript quality is improved sufficiently for publication. |
| <b>REVIEWER</b>         | Dean Markić<br>Department of Urology, University Hospital Rijeka, Croatia                                        |
| <b>REVIEW RETURNED</b>  | 26-Apr-2018                                                                                                      |
| <b>GENERAL COMMENTS</b> | According to me this paper is adequate for publication.                                                          |
